# Supplementary material for: Pediatric T-cell acute lymphoblastic leukemia blast signature and MRD associated immune environment changes defined by single cell transcriptomics analysis
Source: PubMed Central journal article supplement (PMC10397284; doi:10.1038/s41598-023-39152-z), 2023-08-02
Supplement: 41598_2023_39152_MOESM1_ESM.pdf [file 41598_2023_39152_MOESM1_ESM.pdf]

Supplementary File

**Pediatric T-cell acute lymphoblastic leukemia blast signature and MRD associated immune environment changes defined by single cell transcriptomics analysis.**

Swati S. Bhasin<sup>1,2\*</sup>, Beena E. Thomas<sup>1,2</sup>, Ryan J. Summers<sup>1,2</sup>, Debasree Sarkar<sup>1,3</sup>, Hope Mumme<sup>1,3</sup>, William Pilcher<sup>4</sup>, Mohamed Emam<sup>2</sup>, Sunil S. Raikar<sup>1,2</sup>, Sunita I. Park<sup>5</sup>, Sharon M. Castellino<sup>1,2</sup>, Douglas K. Graham<sup>1,2</sup>, Manoj K. Bhasin<sup>1-4</sup>, Deborah DeRyckere<sup>1,2</sup>.

**\*Corresponding author**

1. Aflac Cancer and Blood Disorders Center, Children's Healthcare of Atlanta, Atlanta, GA
2. Department of Pediatrics, Emory University School of Medicine, Atlanta, GA
3. Department of Biomedical Informatics, Emory University School of Medicine, Atlanta, GA
4. Wallace H Coulter Department of Biomedical Engineering, Georgia Institute of Technology, Atlanta, GA
5. Department of Pathology, Children's Healthcare of Atlanta, Department of Pathology and Laboratory Medicine, Emory University School of Medicine, Atlanta, GA

## Supplementary Figures

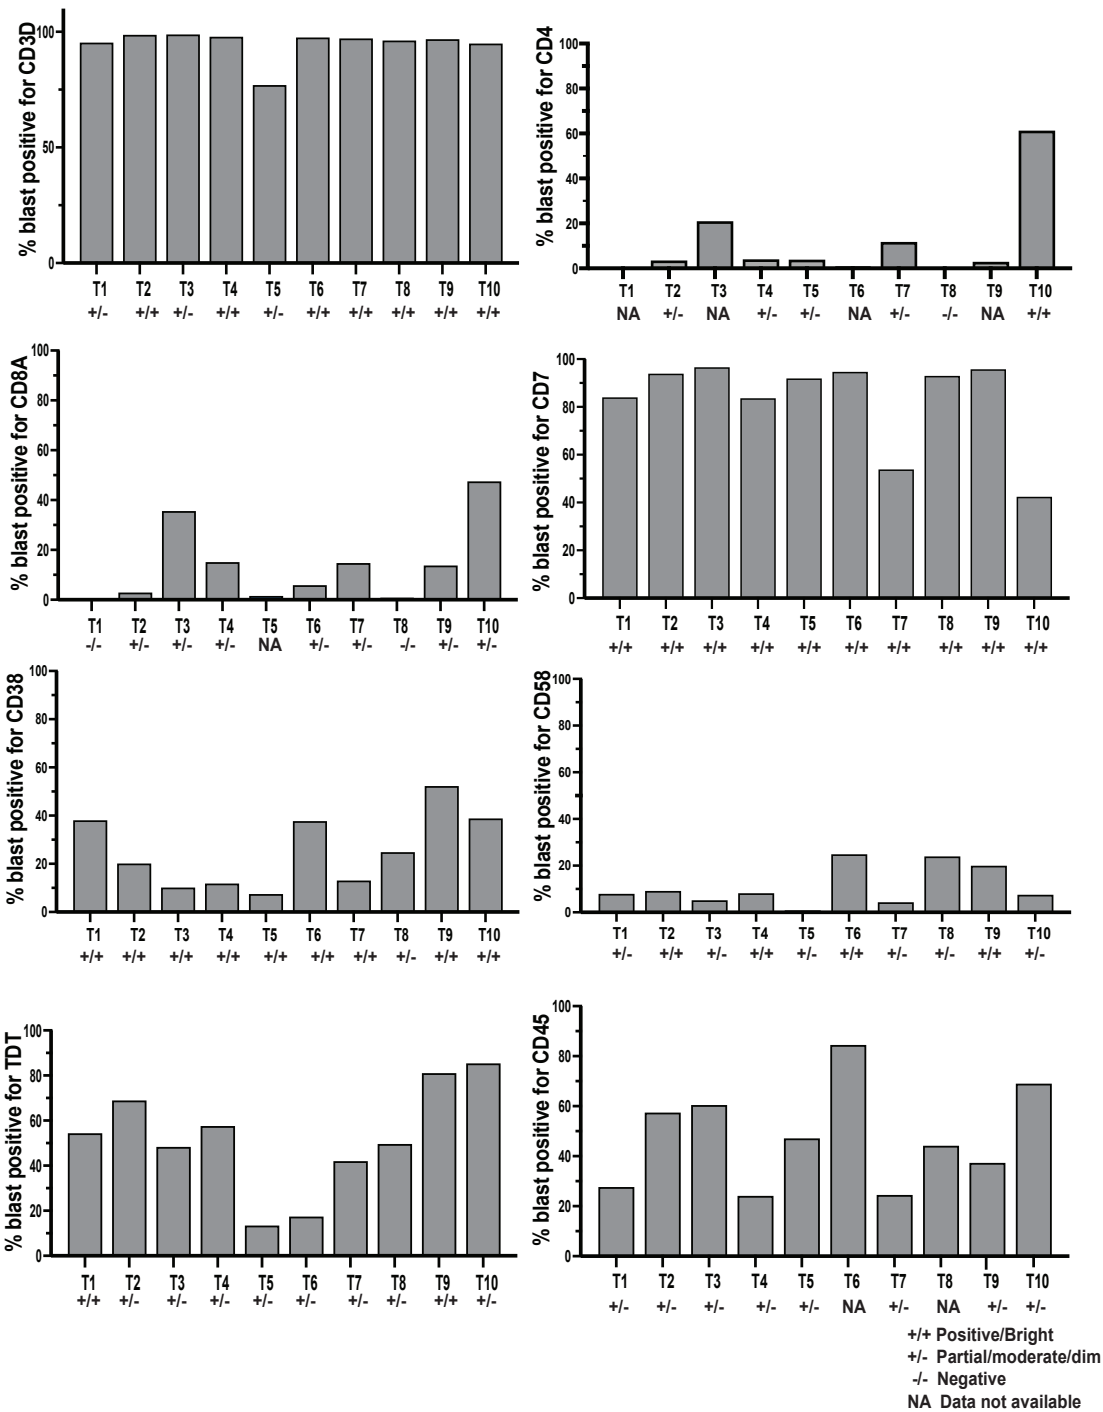

**Figure S1** Bar plots showing percent of blast cells expressing a given marker (as labeled along y-axis) in each patient bone marrow sample (at diagnosis), as labeled along the x-axis. The labels +/+, +/-, -/-, and NA below sample identity along the x-axis, indicate surface protein flow cytometric assignments into positive/bright, partial/moderate/dim, negative and data not available respectively.

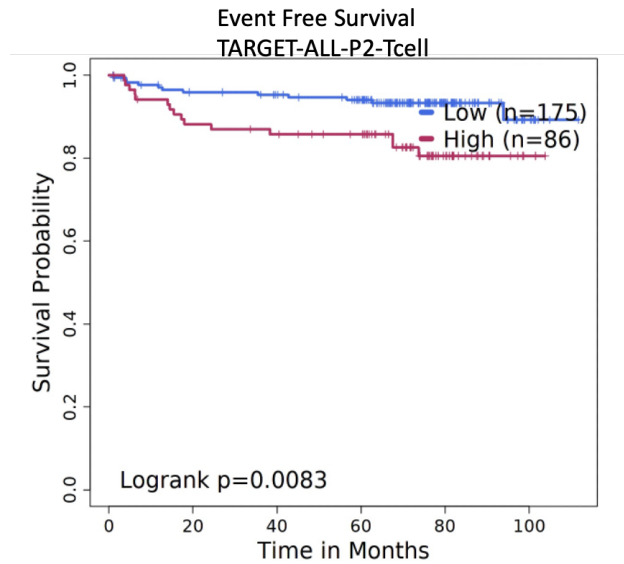

**Figure S2.** Survival analysis depicting combined over expression of the T-ALL blast expressing top 25 genes in the TARGET ALL phase2 cohort is significantly associated with poorer event free survival ( $HR=2.7$ ,  $LR P$  value=0.008).

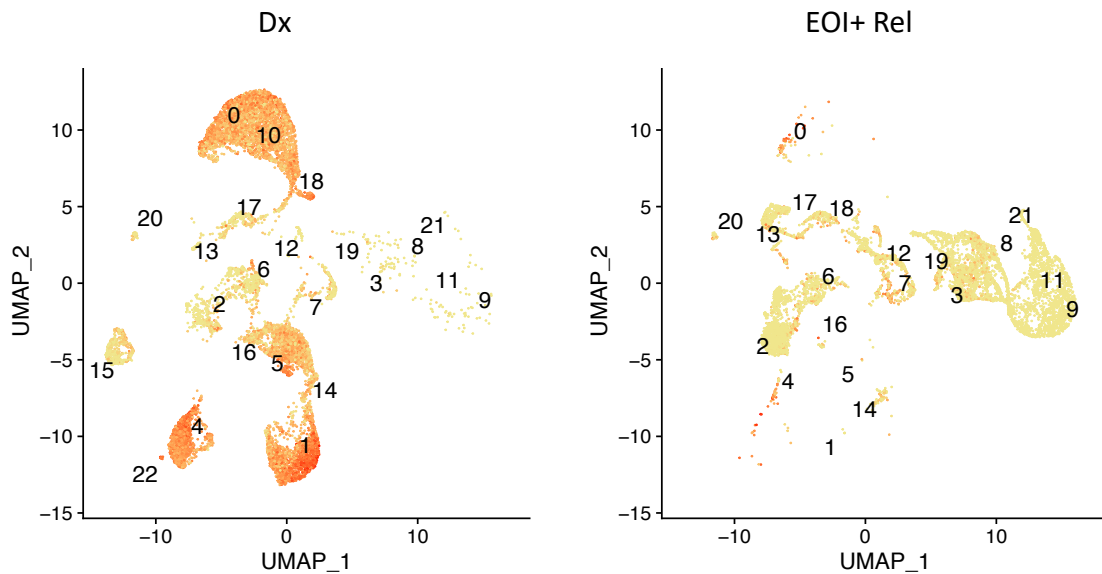

**Figure S3.** Split UMAP plot of the Dx, EOI, Relapse merged object showing Dx cells on the left and EOI, Relapse cells on the right. Plot shows combined expression (denoted by intense orange) of top genes derived from the blast signature in the Dx, EOI, Relapse UMAPs. Orange color indicates high expression and yellow color indicates low expression.

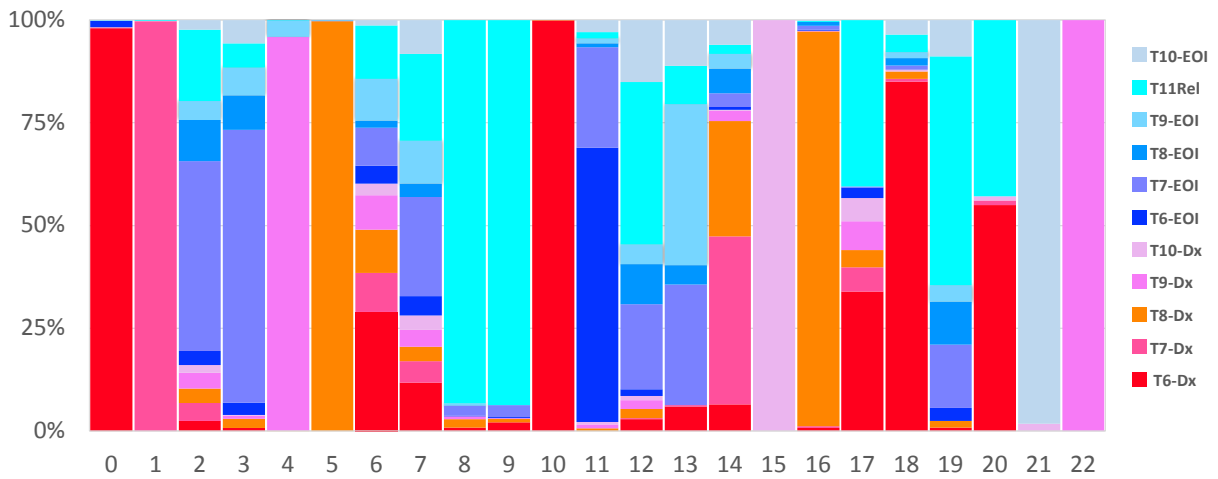

**Figure S4.** Bar-plot of cluster-wise distribution in the merged Dx, EOI, Relapse object of samples T6-T11 (Dx, matched EOI, and Relapse). x-axis denotes cluster number while y-axis represents percent composition by sample. Each sample is shown in a different color as noted in the legend on the right. Matched Dx and EOI samples have same number and with Dx or EOI suffix, respectively.

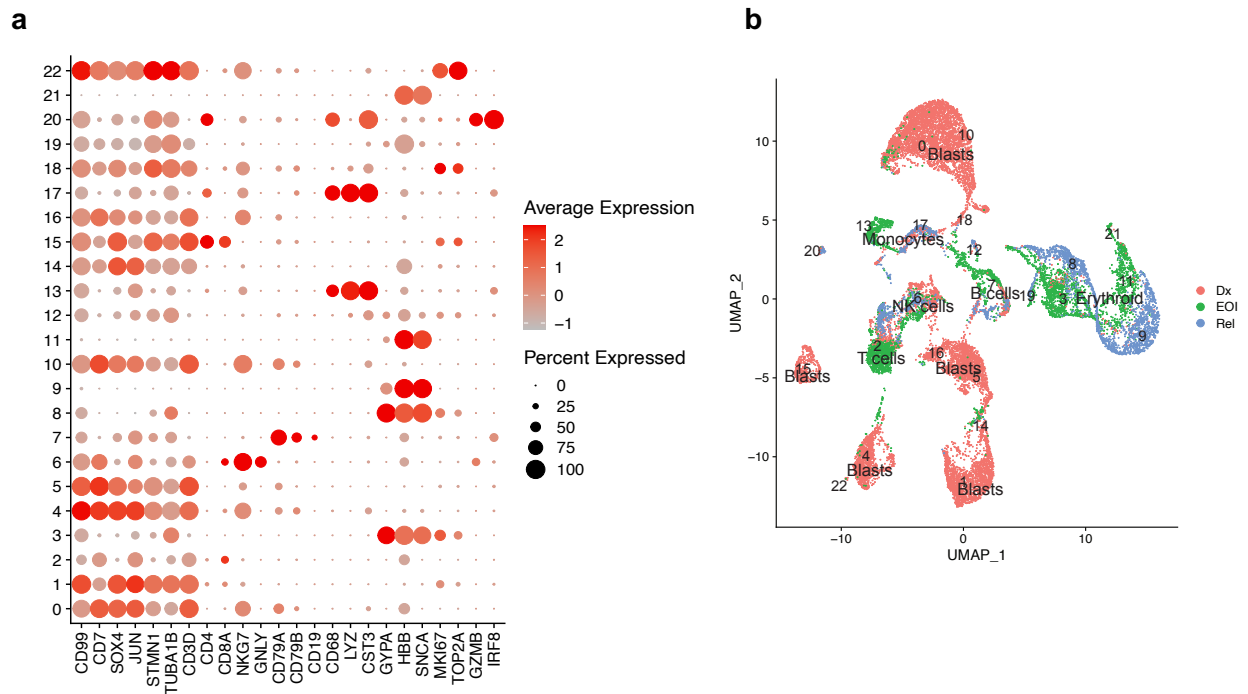

**Figure S5. (a)** Dot-Plot showing cluster-wise expression of markers used for annotation of Dx, EOI, Relapse merged object. **(b)** Merged Dx, EOI, Relapse UMAP plot showing Dx, EOI, and Relapse cells colored in red, green and blue colors, respectively. The cluster numbers are as shown, and major cell types are labeled based on the canonical marker expression in (a).

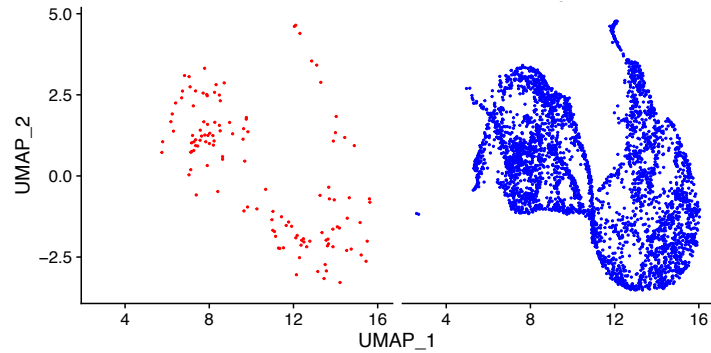

**Figure S6.** Split UMAP plot showing the distribution of the erythroid cell clusters. Dx cells are on the left (red) and EOI, Relapse cells (blue) are on the right.

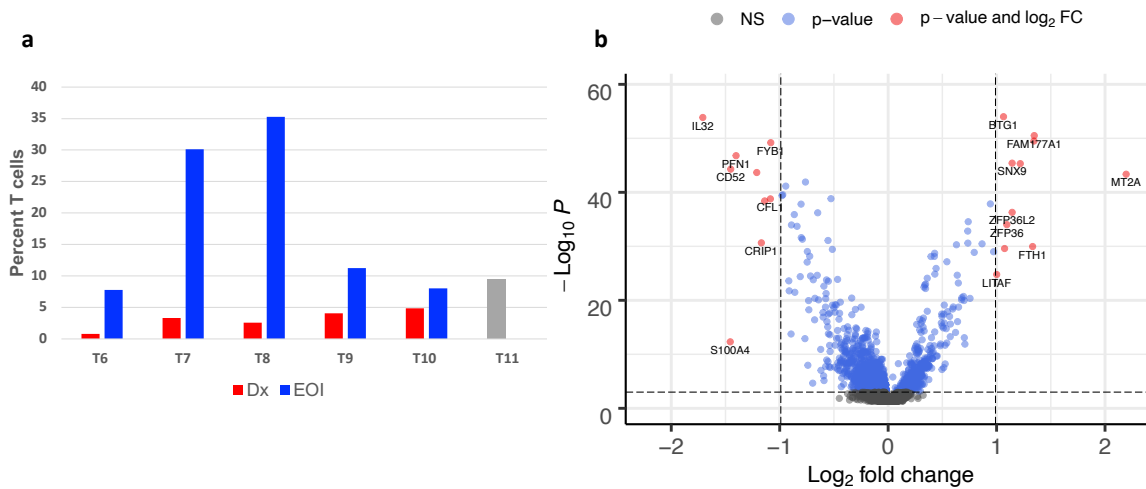

**Figure S7. (a)** Percent T cells of total cells captured by scRNAseq in each sample and **(b)**Volcano plot showing differentially expressed genes between T-cells before and after induction therapy generated using the 'EnhancedVolcano' package in R/Bioconductor. Significantly upregulated genes at EOI relative to Dx are shown on the right (positive fold change) while downregulated genes are shown on the left (negative fold change) with grey, blue and red color dots indicating genes that are not significant (NS), P value significant and P value significant with log<sub>2</sub> fold change >1, respectively.

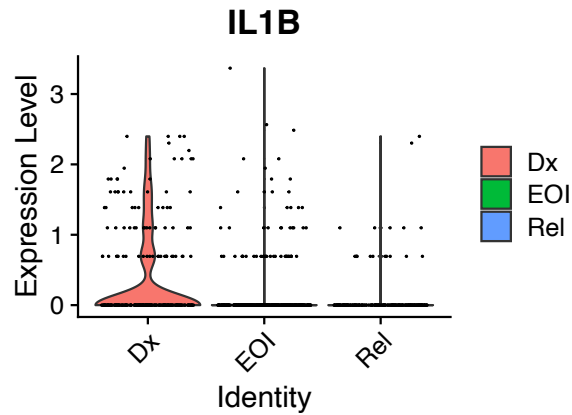

**Figure S8.** Violin Plot showing *IL1B* expression split across Dx, EOI and Relapse samples in Monocyte clusters 13 and 17 combined

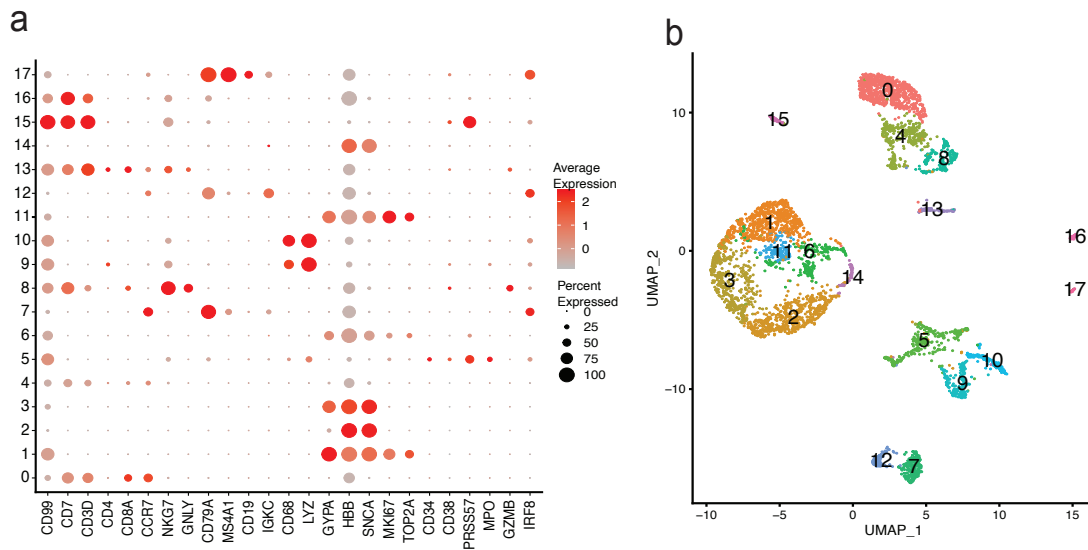

**Figure S9 (a)** Dot plot showing cluster-wise expression of markers used for annotation of the merged EOI time point samples, T6-T10. **(b)** Merged EOI UMAP plot showing clusters 0-17 in different colors.

## Supplementary tables

**Table S1**

T-ALL patient information for samples T1-T11, included in this study. Samples were collected from patients T6-T10 at diagnosis (Dx) and end of induction (EOI). All other patients provided a single sample at Dx or relapse (rel).

| Sample ID | Age at Dx (years) | Race                      | New Dx or Rel | Sample time point (Dx, EOI, or Rel) | Initial WBC at Dx ( $\times 10^3/\mu\text{l}$ ) | PB Blasts at Dx (%) | BMA Blasts at Dx (%) | EOI MRD  | EOI MRD % | Induction Regimen | Has patient relapsed? | Karyotype                                                             | ETP-ALL or near ETP-ALL features      | CNS disease | CNS leukemia disease (at Dx) |
|-----------|-------------------|---------------------------|---------------|-------------------------------------|-------------------------------------------------|---------------------|----------------------|----------|-----------|-------------------|-----------------------|-----------------------------------------------------------------------|---------------------------------------|-------------|------------------------------|
| T1        | 10                | Black or African American | New Dx        | Dx                                  | 140.02                                          | 80.3                | 97                   | Negative | 0         | AALL1231          | No                    | 46,XY[59]                                                             | Yes (one blast population is ETP ALL) | No          | CNS 1                        |
| T2        | 16.5              | Black or African American | New Dx        | Dx                                  | 298.3                                           | 90.3                | 94                   | Negative | 0         | AALL1231          | No                    | 46,XY[10]                                                             | No                                    | Yes         | CNS 2                        |
| T3        | 1.7               | Black or African American | New Dx        | Dx                                  | 130.3                                           | 63.5                | 85.8                 | Negative | 0         | AALL1231          | No                    | 46,XX,t(11;14)(p13;q11.2)(10)46,XX[23]                                | No                                    | No          | CNS 1                        |
| T4        | 3.2               | Asian                     | New Dx        | Dx                                  | 103.09                                          | 88.3                | 96.1                 | Negative | 0         | AALL1231          | No                    | 46,XX;[9](q10)[5]46,XX[20]                                            | No                                    | Yes         | CNS 2                        |
| T5        | 13.5              | White                     | New Dx        | Dx                                  | 100.8                                           | 83.7                | 81.5                 | Positive | 0.07      | AALL0434          | No                    | 46,XX,t(10;11)(p13;q21)[5]46,XX[28]                                   | No                                    | No          | CNS 1                        |
| T6        | 5                 | Black or African American | New Dx        | Dx, EOI                             | 101.4                                           | 8                   | 72.9                 | Positive | 5.4       | AALL1231          | No                    | 46,XY[30]                                                             | No                                    | Yes         | CNS 2                        |
| T7        | 6.4               | White                     | New Dx        | Dx, EOI                             | 127                                             | 81.3                | 95.2                 | Negative | 0         | AALL1231          | No                    | 46,XY,del(10)(q23)[2]46,XY[18]                                        | No                                    | No          | CNS 1                        |
| T8        | 8                 | White                     | New Dx        | Dx, EOI                             | 14.77                                           | 63                  | 64.6                 | Positive | 8         | AALL0434          | No                    | 50-51,XY,+8,+10,+11,der(11)(9;11)(q21;p12),+13,+19,+22[cp20]46,XY[10] | Yes (near ETP ALL)                    | No          | CNS 1                        |
| T9        | 7.7               | Black or African American | New Dx*       | Dx, EOI                             | 113.1                                           | 89.7                | 75.6                 | Positive | 5         | NeI/VP/CTX        | No                    | 46,XY[20]                                                             | Yes (near ETP ALL like)               | Yes         | CNS 2                        |
| T10       | 4.1               | White                     | New Dx        | Dx, EOI                             | 84.44                                           | 57.7                | 95.4                 | Negative | 0         | AALL0434          | No                    | 46,XX,30                                                              | No                                    | Yes         | CNS 2                        |
| T11       | 11.1              | Black or African American | Rel           | Rel                                 | 122.63                                          | 78.9                | N/A                  | Negative | 0         | AALL1231          | Yes                   | 46,XY[20]                                                             | No                                    | Yes         | CNS 3                        |

Dx - Diagnosis, Rel - Relapse, EOI - End of Induction, WBC - White Blood Cell, PB - Peripheral Blood, BMA - Bone Marrow Aspirate, MRD - Minimal Residual Disease, CNS - Central Nervous System, \*Secondary Malignancy

**Table S2**

Table showing the top 25 cluster distinguishing genes for each of the 0-20 clusters of the merged TALL diagnosis samples and Controls object. The top row of each column indicates cluster number.

| 0        | 1       | 2        | 3          | 4        | 5       | 6      | 7         | 8        | 9      | 10         |
|----------|---------|----------|------------|----------|---------|--------|-----------|----------|--------|------------|
| TRDV1    | TRAF4   | TRBV11-2 | TRGV4      | IFI27    | TRGC2   | RPS29  | TRBV20-1  | TRBV12-5 | GNLY   | \$100A9    |
| IL32     | EIF1    | MAL      | TMEM131L   | JUN      | ZBTB16  | RPL21  | HES4      | FXVD2    | NKG7   | \$100A8    |
| IFITM1   | CHI3L2  | HES4     | ARMH1      | SCGB3A1  | MT-ATP8 | RPL41  | FOS       | TRBV2    | CCL5   | LYZ        |
| IFITM2   | CHD1    | PPIA     | CDK6       | PMAIP1   | RPL22L1 | RPS20  | XG        | \$100A10 | GZMB   | CST3       |
| TRGV5    | HLA-B   | FAM173A  | MYO7B      | CHI3L2   | PDLIM1  | RPS10  | TUBB      | MEST     | CST7   | AC020656.1 |
| KRT1     | SFPQ    | CD1E     | CLEC11A    | GADD45B  | ITM2A   | RPL27A | MAL       | CRIP1    | PRF1   | TYROBP     |
| AHNAK    | CLEC2B  | CD1B     | PGM2L1     | CD99     | STXPB2  | RPL31  | SERPINE1  | PTCRA    | FGFBP2 | FTL        |
| MYOM2    | RNF11   | GAPDH    | TMSB10     | H1FX     | GNA15   | TRAC   | STMN1     | ID3      | CTSW   | \$100A6    |
| LTB      | SLC25A6 | FABP5    | EVL        | ATF3     | SCGB3A1 | RPL38  | GAPDH     | GAPDH    | KLRD1  | FCN1       |
| GZMA     | RELB    | ATP5MC3  | PRMT7      | FOS      | TPM4    | RPS27  | H2AFZ     | PTMS     | KLRB1  | \$100A4    |
| TRDC     | LDLR    | TRBC1    | TFDP2      | GAPDH    | TRDC    | RPL13A | TRBV6-6   | H2AFZ    | GZMH   | CTSS       |
| PTPRCAP  | KDM5B   | HMGGA1   | DNTT       | TUBA1B   | BLK     | RPL36A | TXN       | TYMS     | GZMA   | \$100A12   |
| KLRB1    | MT-ND5  | RPLP0    | CD1B       | IER2     | PTTG1P  | RPS17  | MZB1      | HMG2     | TYROBP | FCER1G     |
| CTSW     | ZNF292  | HSPD1    | TRGC2      | UBC      | TRGV2   | RPL7   | CD99      | HES4     | CCL4   | LGALS1     |
| HLA-E    | RTN4    | ZFAS1    | STT3B      | ENO1     | EEF2    | RPLP2  | HIST1H2BK | VIM      | B2M    | COTL1      |
| CD69     | RB1CC1  | SIVA1    | AC245060.5 | GYPC     | MT-ND2  | RPL34  | TYMS      | BEX1     | HLA-C  | \$100A11   |
| \$100A11 | CCNI    | RPS26    | TSC22D3    | GADD45A  | HPGD    | RPL23  | CLIP3     | TSC22D1  | CMC1   | HLA-DRA    |
| ANXA1    | CHD2    | DUT      | CD1E       | MIF      | RPS19   | RPL9   | CDT1      | ID1      | SRGN   | HLA-DRB1   |
| CRIP1    | TSPYL2  | NME2     | PTP4A2     | H3F3B    | CIRBP   | RPL23A | MYO7B     | MIF      | HLA-B  | SRGN       |
| SELL     | EIF4G2  | MZT2B    | ARL4C      | KLF6     | MT-CYB  | RPL27  | BTF3      | TXN      | HOPX   | VCAN       |
| CD52     | SLC2A3  | RCBTB2   | DDX17      | PPP1R15A | EEF1G   | RPS6   | VAT1      | TUBB     | HLA-A  | SERPINA1   |
| ZFP36L2  | SRSF11  | HMGB2    | TCF7       | H2AFY    | CD82    | RPL37A | DHFR      | TUBA1B   | FCER1G | MNDA       |
| LSP1     | RBM38   | H2AFZ    | GALNT2     | H1F0     | RPL18   | TOMM7  | TUBA1B    | HMGB2    | ID2    | CD74       |
| SLFN5    | RPS4X   | TUBB     | TASP1      | TPI1     | SELENOW | RPL39  | HMG2      | Z93241.1 | FCGR3A | LST1       |
| CD3E     | HSP90B1 | TUBA1B   | MBNL1      | HMG2     | CALR    | RPS25  | DUSP1     | HSPA5    | SPON2  | TYMP       |

| 11      | 12       | 13       | 14     | 15         | 16         | 17       | 18       | 19      | 20       |
|---------|----------|----------|--------|------------|------------|----------|----------|---------|----------|
| IGLL1   | CD74     | IGHM     | CCL5   | AL365440.2 | MT-ND4L    | RPS27A   | HBB      | GZMK    | GZMB     |
| ACY3    | IGHM     | HLA-DRA  | GZMK   | CD1A       | MT-CO2     | HLA-B    | HBD      | LGALS3  | JCHAIN   |
| TRDV3   | HLA-DRA  | CD74     | RPS29  | TOP2A      | MT-CO1     | TOMM7    | HBA1     | CD8B    | IRF8     |
| TRGV3   | CD79B    | IGKC     | TRAC   | SMPD3      | MT-CYB     | RPS25    | HBA2     | CD27    | PLD4     |
| SOC52   | TCL1A    | HLA-DPB1 | RPL41  | RTKN2      | MT-CO3     | RPL14    | CA1      | CST7    | LILRA4   |
| RGPD3   | HLA-DRB1 | IGLC2    | RPL27A | AL138899.1 | MT-ND1     | HLA-C    | HBM      | CCL5    | CCDC50   |
| CAT     | IGLC2    | HLA-DPA1 | B2M    | CENPF      | MT-ATP6    | RPS14    | AHSP     | GZMA    | TCF4     |
| PRSS57  | HLA-DPB1 | HLA-DRB1 | CXCR4  | CD1E       | MT-ND5     | RPL11    | ALAS2    | ISG20   | RNASE6   |
| DUSP6   | CD79A    | CD79A    | CST7   | NUSAP1     | MT-ATP8    | RPL32    | SLC25A37 | COTL1   | SPIB     |
| DDIT4   | HLA-DPA1 | IGHD     | RPS20  | XIST       | MT-ND6     | RPL30    | BLVRB    | CNN2    | APP      |
| DNTT    | VPREB3   | HLA-DQB1 | RPS27  | TFDP2      | MT-ND3     | JUNB     | PRDX2    | CD81    | UGCG     |
| TUBA1A  | HLA-DQB1 | CD79B    | RPL13A | MKI67      | MT-ND2     | RPL13    | CA2      | SRGN    | SERPINF1 |
| TNFAIP3 | HLA-DQA1 | MS4A1    | GZMA   | PCLAF      | MT-ND4     | SARAF    | SLC4A1   | CD74    | HLA-DPA1 |
| GNA15   | MS4A1    | RPS29    | RPL21  | TRBC2      | XIST       | KLF2     | SLC25A39 | \$100A4 | IRF7     |
| TPM4    | CD24     | CXCR4    | RPL31  | NUCKS1     | HES4       | RPS12    | SNCA     | MT2A    | CST3     |
| SELENOW | IGKC     | RPL41    | RPL38  | DEK        | PGGHG      | B2M      | GYPA     | HLA-A   | GRN      |
| MS4A4E  | IGLC3    | TCL1A    | RPS10  | NUCB2      | SRSF10     | RPS3A    | HMBS     | \$100A6 | FCER1G   |
| TSC22D3 | HLA-DMA  | CD37     | DUSP2  | STMN1      | SF1        | LEPROTL1 | BSG      | HLA-C   | HLA-DRB1 |
| EXD3    | LAPTM5   | IGLC3    | HLA-C  | GNAS       | HNRNPH1    | IL7R     | SELENBP1 | ARPC1B  | HLA-DRA  |
| GSTP1   | CD37     | RPL13A   | HLA-A  | HIST1H4C   | MZB1       | MT-ND3   | FECH     | TMSB4X  | HLA-DPB1 |
| RGPD4   | RGS2     | RPS10    | HLA-B  | HMGB2      | FUS        | RPS4Y1   | HEMGN    | NKG7    | NPC2     |
| VPREB1  | CD83     | RPL21    | RPL36A | MT-ATP6    | CCNL1      | RPS26    | LGALS3   | LIMD2   | CD74     |
| ENO1    | IGLL1    | RPS27    | RPS17  | MT-ND4     | NKTR       | DNAJB1   | TRIM58   | LGALS1  | ALOX5AP  |
| PTGER3  | VPREB1   | RPS20    | CMC1   | MT-ND3     | MIR181A1HG | MT-ND4   | GYPC     | PTPRCAP | ITM2C    |
| CD82    | CXCR4    | RPL27A   | KLRB1  | RPS10      | FOSB       | MT-ND2   | BNIP3L   | CD52    | PLAC8    |



**Table S3**

List of 119 genes significantly overexpressed in T-ALL blasts (p value < .05, and  $\geq$  1.5-fold change).

|    | gene       | avg_log2FC | pct.1 | pct.2 |     | gene     | avg_log2FC | pct.1 | pct.2 |
|----|------------|------------|-------|-------|-----|----------|------------|-------|-------|
| 1  | MT-ND4L    | 3.65       | 0.99  | 0.49  | 61  | SFPQ     | 0.89       | 0.68  | 0.34  |
| 2  | MT-ATP8    | 3.10       | 0.97  | 0.18  | 62  | RNASEK   | 0.89       | 0.54  | 0.03  |
| 3  | SOX4       | 2.35       | 0.91  | 0.12  | 63  | MBNL1    | 0.89       | 0.70  | 0.35  |
| 4  | JUN        | 2.27       | 0.82  | 0.26  | 64  | GALNT2   | 0.89       | 0.48  | 0.03  |
| 5  | STMN1      | 2.23       | 0.86  | 0.24  | 65  | ADA      | 0.88       | 0.52  | 0.09  |
| 6  | TUBA1B     | 2.19       | 0.82  | 0.43  | 66  | ALDOA    | 0.83       | 0.66  | 0.28  |
| 7  | CD99       | 2.16       | 0.96  | 0.53  | 67  | HIST1H1D | 0.83       | 0.39  | 0.03  |
| 8  | KLF6       | 2.13       | 0.86  | 0.25  | 68  | WSB1     | 0.81       | 0.55  | 0.20  |
| 9  | HES4       | 2.11       | 0.54  | 0.02  | 69  | RBBP6    | 0.81       | 0.52  | 0.11  |
| 10 | FOS        | 2.02       | 0.62  | 0.16  | 70  | BRD2     | 0.81       | 0.55  | 0.13  |
| 11 | EEF1G      | 2.02       | 0.93  | 0.27  | 71  | ATP5MC3  | 0.81       | 0.75  | 0.45  |
| 12 | TUBB       | 1.85       | 0.84  | 0.38  | 72  | ATP5F1B  | 0.80       | 0.77  | 0.43  |
| 13 | TUBA1A     | 1.80       | 0.85  | 0.25  | 73  | TPM3     | 0.79       | 0.83  | 0.51  |
| 14 | PTPRCAP    | 1.74       | 0.75  | 0.02  | 74  | SPTAN1   | 0.78       | 0.49  | 0.08  |
| 15 | GSTP1      | 1.66       | 0.85  | 0.34  | 75  | EPC1     | 0.77       | 0.69  | 0.32  |
| 16 | MZB1       | 1.60       | 0.68  | 0.03  | 76  | RCBTB2   | 0.77       | 0.39  | 0.04  |
| 17 | NME2       | 1.60       | 0.76  | 0.07  | 77  | RCC1     | 0.75       | 0.43  | 0.04  |
| 18 | PPP1R15A   | 1.47       | 0.70  | 0.12  | 78  | POLR2A   | 0.75       | 0.45  | 0.07  |
| 19 | TAGLN2     | 1.47       | 0.89  | 0.44  | 79  | NREP     | 0.75       | 0.40  | 0.01  |
| 20 | CH13L2     | 1.43       | 0.41  | 0.04  | 80  | CLEC11A  | 0.75       | 0.37  | 0.04  |
| 21 | CDK6       | 1.43       | 0.68  | 0.07  | 81  | SSH2     | 0.74       | 0.46  | 0.09  |
| 22 | SELENOW    | 1.43       | 0.81  | 0.35  | 82  | H2AFV    | 0.74       | 0.64  | 0.29  |
| 23 | GADD45B    | 1.37       | 0.57  | 0.17  | 83  | LST1     | 0.72       | 0.43  | 0.10  |
| 24 | IER2       | 1.34       | 0.79  | 0.45  | 84  | TASP1    | 0.72       | 0.36  | 0.03  |
| 25 | ARMH1      | 1.33       | 0.67  | 0.16  | 85  | HIST1H1C | 0.71       | 0.36  | 0.05  |
| 26 | MT-ND6     | 1.32       | 0.63  | 0.08  | 86  | CCNL1    | 0.71       | 0.66  | 0.35  |
| 27 | MARCKSL1   | 1.31       | 0.79  | 0.19  | 87  | VAT1     | 0.71       | 0.40  | 0.02  |
| 28 | TXN        | 1.30       | 0.77  | 0.25  | 88  | FDFT1    | 0.71       | 0.47  | 0.14  |
| 29 | EIF4G2     | 1.28       | 0.79  | 0.26  | 89  | RUNX1    | 0.71       | 0.43  | 0.05  |
| 30 | AC084033.3 | 1.23       | 0.64  | 0.04  | 90  | STT3B    | 0.71       | 0.49  | 0.15  |
| 31 | H1FX       | 1.21       | 0.66  | 0.29  | 91  | KHDRBS1  | 0.70       | 0.68  | 0.34  |
| 32 | GLUL       | 1.20       | 0.59  | 0.03  | 92  | CHD1     | 0.70       | 0.44  | 0.11  |
| 33 | SLC25A5    | 1.19       | 0.86  | 0.45  | 93  | HNRNPL   | 0.69       | 0.48  | 0.12  |
| 34 | DNTT       | 1.12       | 0.44  | 0.02  | 94  | SET      | 0.69       | 0.71  | 0.41  |
| 35 | TUBB4B     | 1.12       | 0.55  | 0.08  | 95  | IDH2     | 0.67       | 0.54  | 0.21  |
| 36 | HIST1H1E   | 1.08       | 0.46  | 0.03  | 96  | SLC38A2  | 0.67       | 0.46  | 0.13  |
| 37 | PSMA6      | 1.08       | 0.60  | 0.09  | 97  | RAD21    | 0.66       | 0.53  | 0.19  |
| 38 | SPTBN1     | 1.07       | 0.58  | 0.09  | 98  | ZNF428   | 0.66       | 0.59  | 0.22  |
| 39 | YWHAZ      | 1.07       | 0.88  | 0.44  | 99  | SRSF11   | 0.65       | 0.63  | 0.32  |
| 40 | RHOA       | 1.06       | 0.91  | 0.53  | 100 | RALY     | 0.65       | 0.64  | 0.28  |
| 41 | GABARAP    | 1.02       | 0.68  | 0.12  | 101 | C9orf16  | 0.65       | 0.76  | 0.45  |
| 42 | CLIC1      | 1.02       | 0.89  | 0.48  | 102 | JPT1     | 0.65       | 0.52  | 0.18  |
| 43 | CAPG       | 1.01       | 0.53  | 0.05  | 103 | SNHG15   | 0.65       | 0.44  | 0.11  |
| 44 | SRSF10     | 1.01       | 0.69  | 0.22  | 104 | DDAH2    | 0.63       | 0.40  | 0.07  |
| 45 | H2AFY      | 1.00       | 0.70  | 0.27  | 105 | COX5A    | 0.63       | 0.66  | 0.32  |
| 46 | CD82       | 0.98       | 0.51  | 0.06  | 106 | RAB37    | 0.63       | 0.39  | 0.08  |
| 47 | MIR181A1HG | 0.98       | 0.49  | 0.02  | 107 | ILF2     | 0.62       | 0.55  | 0.22  |
| 48 | GNA15      | 0.97       | 0.44  | 0.01  | 108 | ELOVL5   | 0.62       | 0.48  | 0.14  |
| 49 | TPM4       | 0.95       | 0.49  | 0.11  | 109 | SCAI     | 0.61       | 0.39  | 0.06  |
| 50 | PTP4A2     | 0.95       | 0.71  | 0.30  | 110 | MATR3.1  | 0.61       | 0.39  | 0.02  |
| 51 | TFDP2      | 0.95       | 0.47  | 0.07  | 111 | EWSR1    | 0.61       | 0.55  | 0.23  |
| 52 | ATP6V0C    | 0.95       | 0.53  | 0.00  | 112 | VCP      | 0.60       | 0.50  | 0.18  |
| 53 | LDHA       | 0.94       | 0.78  | 0.45  | 113 | HP1BP3   | 0.60       | 0.53  | 0.22  |
| 54 | PSAP       | 0.94       | 0.69  | 0.28  | 114 | AIF1     | 0.60       | 0.61  | 0.28  |
| 55 | TKT        | 0.93       | 0.70  | 0.27  | 115 | PRDX5    | 0.60       | 0.64  | 0.32  |
| 56 | PGM2L1     | 0.92       | 0.43  | 0.04  | 116 | SF3B2    | 0.59       | 0.67  | 0.36  |
| 57 | MYO7B      | 0.91       | 0.37  | 0.00  | 117 | ARF1     | 0.59       | 0.71  | 0.41  |
| 58 | 44445.00   | 0.91       | 0.82  | 0.49  | 118 | ITGAE    | 0.58       | 0.43  | 0.10  |
| 59 | COX6A1     | 0.90       | 0.89  | 0.54  | 119 | YWHAQ    | 0.58       | 0.62  | 0.31  |
| 60 | SEC61B     | 0.90       | 0.79  | 0.40  |     |          |            |       |       |

**Table S4**

Univariate and multivariate analysis of event-free survival association of the top T-ALL blast overexpressing genes using the TARGET ALL Phase2 T cell cohort. Significant p-values ( $p < 0.05$ ) are marked with asterisk. Hazard ratios (HRs) were calculated with low expression as reference for gene-based survival associations, and MRD negative or CNS1 (CNS Negative) as references for clinical-based survival associations. Multivariate analysis was performed with all 24 genes shown, MRD status, and CNS status as variants.

| Gene name              | Grouping method: cutpoint<br>(cutpoint   P-value   percentile) | Univariate     |       |                   | Multivariate<br>(gene expression + MRD status + CNS) |                        |            |
|------------------------|----------------------------------------------------------------|----------------|-------|-------------------|------------------------------------------------------|------------------------|------------|
|                        |                                                                | Defined groups |       | Hazard Ratio      | Log Rank p-value                                     | HR (95% CI)            | HR p-value |
|                        |                                                                | #Low           | #High | HR (95% CI)       | HR p-value                                           |                        |            |
| <i>MT-ND4L</i>         | 7.66   0.700   0.556                                           | 145            | 116   | 0.60 (0.27-1.30)  | 0.21   0.21                                          | 1.296 (0.297-5.66)     | 0.73       |
| <i>MT-ATP8</i>         | 5.21   0.661   0.333                                           | 87             | 174   | 0.57 (0.27-1.20)  | 0.14   0.15                                          | 0.465 (0.101-2.13)     | 0.325      |
| <i>SOX4</i>            | 7.50   0.777   0.460                                           | 120            | 141   | 1.40 (0.65-3.10)  | 0.39   0.39                                          | 1.415 (0.371 - 5.40)   | 0.611      |
| <i>JUN</i>             | 7.72   0.520   0.322                                           | 84             | 177   | 2.20 (0.82-5.70)  | 0.11   0.12                                          | 1.462 (0.349 - 6.12)   | 0.603      |
| <i>STMN1</i>           | 7.25   0.859   0.732                                           | 191            | 70    | 1.50 (0.67-3.30)  | 0.33   0.33                                          | 10.488 (1.473 - 74.67) | 0.019*     |
| <i>TUBA1B</i>          | 7.00   0.750   0.437                                           | 114            | 147   | 0.62 (0.29-1.30)  | 0.21   0.21                                          | 0.096 (0.014 - 0.65)   | 0.016*     |
| <i>CD99</i>            | 7.43   0.277   0.387                                           | 101            | 160   | 2.20 (0.91-5.60)  | 0.072   0.0804                                       | 0.647 (0.129 - 3.24)   | 0.597      |
| <i>KLF6</i>            | 7.32   0.717   0.739                                           | 193            | 68    | 0.47 (0.16-1.4)   | 0.16   0.17                                          | 0.509 (0.095 - 2.74)   | 0.432      |
| <i>HES4</i>            | 3.43   0.0857   0.254                                          | 67             | 194   | 4.50 (1.10-19.0)  | 0.025   0.041*                                       | 4.670 (0.885 - 24.65)  | 0.069      |
| <i>FOS</i>             | 7.84   0.140   0.774                                           | 202            | 59    | 0.12 (0.016-0.89) | 0.013   0.038*                                       | 0.0117 (0.013 - 1.10)  | 0.06       |
| <i>EEF1G</i>           | 0.352   0.859   0.203                                          | 56             | 205   | 0.58 (0.26-1.30)  | 0.18   0.19                                          | 0.319 (0.094 - 1.08)   | 0.067      |
| <i>TUBB</i>            | 7.24   0.914   0.169                                           | 44             | 217   | 2.60 (0.62-11.0)  | 0.17   0.19                                          | 1.045 (0.108 - 10.10)  | 0.97       |
| <i>TUBA1A</i>          | 7.32   0.536   0.686                                           | 179            | 82    | 0.47 (0.18-1.30)  | 0.12   0.13                                          | 0.396 (0.077 - 2.04)   | 0.268      |
| <i>GSTP1</i>           | 8.02   0.812   0.885                                           | 231            | 30    | 2.40 (0.95-5.90)  | 0.058   0.065                                        | 1.685 (0.356 - 7.96)   | 0.511      |
| <i>MZB1</i>            | 6.89   0.0261   0.479                                          | 125            | 136   | 2.70 (1.10-6.40)  | 0.018   0.024*                                       | 1.797 (0.488 - 6.61)   | 0.378      |
| <i>NME2</i>            | 0.815   0.490   0.597                                          | 159            | 102   | 1.80 (0.86-3.90)  | 0.11   0.11                                          | 5.16 (1.444 - 18.44)   | 0.012 *    |
| <i>PPP1R15A</i>        | 7.64   0.450   0.483                                           | 126            | 135   | 0.54 (0.25-1.20)  | 0.12   0.13                                          | 1.319 (0.354 - 4.91)   | 0.68       |
| <i>TAGLN2</i>          | 7.74   0.913   0.870                                           | 227            | 34    | 0.25 (0.034-1.80) | 0.14   0.17                                          | 0.222 (0.023-2.17)     | 0.196      |
| <i>CHI3L2</i>          | 7.33   0.307   0.759                                           | 198            | 63    | 2.20 (1.00-4.80)  | 0.035   0.040*                                       | 1.074 (0.321-3.60)     | 0.908      |
| <i>CDK6</i>            | 7.68   0.178   0.716                                           | 187            | 74    | 2.30 (1.10-4.90)  | 0.024   0.029*                                       | 4.448 (1.439-13.75)    | 0.01**     |
| <i>SELENOW(SEPW1)</i>  | 3.90   0.205   0.218                                           | 57             | 204   | 3.80 (0.89-16.0)  | 0.053   0.072                                        | 1.280 (0.184 - 8.89)   | 0.803      |
| <i>GADD45B</i>         | 5.23   0.94   0.322                                            | 84             | 177   | 0.66 (0.31-1.40)  | 0.29   0.29                                          | 0.349 (0.126-0.97)     | 0.043*     |
| <i>IER2</i>            | 4.93   0.787   0.295                                           | 77             | 184   | 1.90 (0.72-5.00)  | 0.19   0.19                                          | 8.540 (2.084-34.99)    | 0.003**    |
| <i>ARMH1(C1orf228)</i> | 5.92   0.094   0.686                                           | 179            | 82    | 2.50 (1.20-5.40)  | 0.012   0.016*                                       | 6.800 (2.266 - 20.41)  | <0.001***  |
| <i>MRD_Day29_split</i> |                                                                |                |       |                   |                                                      | 1.727 (0.630-4.74)     | 0.288      |
| <i>CNS2</i>            |                                                                |                |       |                   |                                                      | 0.848 (0.241-2.99)     | 0.798      |
| <i>CNS3</i>            |                                                                |                |       |                   |                                                      | 7.698 (2.128 - 27.85)  | 0.002**    |
